# Supplementary material for: Basophil Activation Test Utility as a Diagnostic Tool in LTP Allergy
Source: MDPI journal article supplement (doi:10.3390/ijms23094979), 2022-04-29
Supplement: s1 [file s1]

**Table S1.** Clinical and demographic characteristic of recruited individuals.

|                                                                 | Healthy controls<br>(n=16) | Peach allergic patients to LTP sensitization |                     |                       | <i>p</i> -value |
|-----------------------------------------------------------------|----------------------------|----------------------------------------------|---------------------|-----------------------|-----------------|
|                                                                 |                            | All<br>(n = 92)                              | Group A<br>(n = 55) | Group B<br>(n = 37)   |                 |
| Age (years) <sup>a</sup>                                        | 34.25 ± 13.79              | 33.22 ± 10.22                                | 33.84 ± 10.13       | 32.26 ± 10.44         | N.S.            |
| Female (%)                                                      | 68.75                      | 68.48                                        | 73.36               | 56.76                 | N.S.            |
| SPT Peach enriched with Pru p 3 (mm <sup>2</sup> ) <sup>b</sup> | NA                         | 52.0 (35.0- 80.75)                           | 68.0 (36.0-83.25)   | 45.0 (25.0- 87.5)     | N.S.            |
| SPT Peanut (mm <sup>2</sup> ) <sup>b</sup>                      | NA                         | 40.0 (25.0- 45.0)                            | 0.0 (0.0- 25.0)     | 27.5 (25.0- 45.0)     | †               |
| Total IgE (kU/L) <sup>b</sup>                                   | 88.20 (42.70- 150.0)       | 127.0 (62.0-352.0)                           | 112.0 (58.0- 214.0) | 195.5 (61.58- 612.30) | N.S.            |
| Specific IgE (Pru p 3) (kU/L) <sup>b</sup>                      | 0.01 (0.003- 0.13)         | 6.01 (2.34- 13.2)                            | 4.39 (1.52- 8.70)   | 8.82 (2.95-26.40)     | ‡/ § / ¶/ #     |
| Specific IgE (Ara h 9) (kU/L) <sup>b</sup>                      | 0.004 (0.00025-0.085)      | 2.61 (0.35-20.40)                            | 0.69 (0.35- 1.76)   | 2.61 (0.35- 20.40)    | */**/**         |

<sup>a</sup>Mean ± SD; <sup>b</sup>Median (IQR); † *p* < 0.05 (Group A vs. Group B); ‡ *p* < 0.0001 (Controls vs. All); § *p* < 0.0001 (Controls vs. Group A); ¶ *p* < 0.0001 (Controls vs. Group b); # *p* < 0.01 (Group A vs. Group B); \* *p* < 0.01 (Controls vs. All); \*\* *p* < 0.01 (Controls vs. Group A); \*\*\* *p* < 0.01 (Controls vs. Group B). NA, not available; N.S., not significant; SPT, skin prick test. Group A: patients with confirmed peach allergy and tolerance to peanut; Group B: patients with consistent history to peach and peanut allergy.
